# Supplementary material for: Sr3B14O24: a new borate with a [B14O30] fundamental building block and an unwonted 2D double layer
Source: Royal Society of Chemistry journal article supplement (doi:10.1039/d1dt03653j), 2021-12-01
Supplement: d1dt03653j1.pdf [file d1dt03653j1.pdf]

## Supporting Information

### **Sr<sub>3</sub>B<sub>14</sub>O<sub>24</sub>: A New Borate with [B<sub>14</sub>O<sub>30</sub>] Fundamental Building Block and Unwonted 2D Double Layer**

Chengfa Wu,<sup>†a</sup> Zilong Chen,<sup>†a</sup> Jianbang Chen,<sup>a</sup> Zhihua Yang,<sup>a</sup> Fangfang Zhang,<sup>a</sup> Hongsheng Shi<sup>a,\*</sup> and Shilie Pan<sup>a,\*</sup>

<sup>a</sup>CAS Key Laboratory of Functional Materials and Devices for Special Environments; Xinjiang Technical Institute of Physics and Chemistry, CAS; Xinjiang Key Laboratory of Electronic Information Materials and Devices, 40-1 South Beijing Road, Urumqi 830011, China.

<sup>†</sup>These authors contributed equally.

\*Corresponding authors, Emails: shihs@ms.xjb.ac.cn, slpan@ms.xjb.ac.cn.

**Table S1.** Atomic coordinates ( $\times 10^4$ ), equivalent isotropic displacement parameters ( $\text{\AA}^2 \times 10^3$ ), and bond valence sum (BVS) calculations for  $\text{Sr}_3\text{B}_{14}\text{O}_{24}$ .  $U(\text{eq})$  is defined as one-third of the trace of the orthogonalized  $U_{ij}$  tensor.

| Atoms | $x/a$     | $y/b$   | $z/c$   | $U(\text{eq})$ | BVS  |
|-------|-----------|---------|---------|----------------|------|
| Sr(1) | 17338(1)  | 894(1)  | 9443(1) | 13(1)          | 2.20 |
| Sr(2) | 11795(1)  | 3308(1) | 7312(1) | 27(1)          | 1.97 |
| Sr(3) | -2409(1)  | 832(1)  | 5561(1) | 12(1)          | 2.27 |
| B(1)  | 13910(10) | 3314(6) | 9300(3) | 13(1)          | 3.05 |
| B(2)  | 14570(11) | 7040(6) | 8132(4) | 18(2)          | 3.05 |
| B(3)  | 11615(11) | 5912(6) | 7925(3) | 17(2)          | 3.10 |
| B(4)  | 10306(10) | 2865(5) | 9055(3) | 12(1)          | 3.04 |
| B(5)  | 12788(10) | 1334(6) | 9321(3) | 13(2)          | 3.04 |
| B(6)  | 7354(9)   | 4220(5) | 9143(3) | 10(1)          | 3.04 |
| B(7)  | 8461(10)  | 4758(6) | 8116(3) | 16(2)          | 3.06 |
| B(8)  | 7275(10)  | 4686(6) | 6949(3) | 15(2)          | 3.07 |
| B(9)  | 4117(10)  | 5906(6) | 7177(3) | 15(2)          | 3.01 |
| B(10) | 1056(11)  | 6981(6) | 6931(3) | 18(2)          | 3.02 |
| B(11) | 7669(10)  | 4168(5) | 5836(3) | 10(1)          | 3.05 |
| B(12) | 4532(10)  | 2889(6) | 5851(3) | 13(1)          | 3.07 |
| B(13) | 1000(9)   | 3329(6) | 5572(3) | 13(1)          | 3.06 |
| B(14) | 2172(10)  | 1340(6) | 5589(3) | 13(2)          | 3.02 |
| O(1)  | 15693(6)  | 7828(3) | 8478(2) | 17(1)          | 2.03 |
| O(2)  | 15168(6)  | 6822(3) | 7564(2) | 16(1)          | 1.98 |
| O(3)  | 12929(6)  | 6550(3) | 8371(2) | 16(1)          | 2.12 |
| O(4)  | 10218(6)  | 5320(4) | 8298(2) | 19(1)          | 1.93 |
| O(5)  | 7072(6)   | 4453(3) | 8501(2) | 14(1)          | 1.95 |
| O(6)  | 8450(5)   | 3184(3) | 9312(2) | 11(1)          | 1.91 |
| O(7)  | 8237(6)   | 4461(4) | 7504(2) | 22(1)          | 2.15 |
| O(8)  | 12885(6)  | 5194(3) | 7560(2) | 16(1)          | 2.09 |
| O(9)  | 11955(6)  | 3664(3) | 9226(2) | 13(1)          | 2.08 |
| O(10) | 15330(6)  | 4140(3) | 9406(2) | 13(1)          | 2.06 |
| O(11) | 14320(5)  | 2154(3) | 9295(2) | 14(1)          | 2.29 |
| O(12) | 13422(5)  | 236(3)  | 9394(2) | 13(1)          | 2.06 |
| O(13) | 10841(5)  | 1681(3) | 9295(2) | 13(1)          | 2.06 |
| O(14) | 8282(6)   | 4234(3) | 6479(2) | 16(1)          | 1.91 |
| O(15) | 6450(5)   | 3193(3) | 5644(2) | 12(1)          | 1.95 |
| O(16) | 4073(5)   | 1716(3) | 5604(2) | 13(1)          | 2.12 |
| O(17) | 2928(6)   | 3695(3) | 5628(2) | 13(1)          | 2.10 |
| O(18) | 603(5)    | 2153(3) | 5620(2) | 14(1)          | 2.17 |
| O(19) | -461(5)   | 4128(3) | 5492(2) | 11(1)          | 2.14 |
| O(20) | 1591(5)   | 221(3)  | 5522(2) | 12(1)          | 2.04 |
| O(21) | 5531(6)   | 5276(4) | 6840(2) | 22(1)          | 1.89 |
| O(22) | 2711(6)   | 6480(3) | 6704(2) | 17(1)          | 1.98 |
| O(23) | 521(6)    | 6752(3) | 7514(2) | 18(1)          | 2.17 |

---

|       |         |         |         |       |      |
|-------|---------|---------|---------|-------|------|
| O(24) | -201(6) | 7742(3) | 6620(2) | 16(1) | 1.95 |
|-------|---------|---------|---------|-------|------|

---

**Table S2.** Anisotropic displacement parameters ( $\text{\AA}^2$ ) for  $\text{Sr}_3\text{B}_{14}\text{O}_{24}$ .

| Atom  | $U_{11}$ | $U_{22}$ | $U_{33}$ | $U_{23}$ | $U_{13}$ | $U_{12}$ |
|-------|----------|----------|----------|----------|----------|----------|
| Sr(1) | 10(1)    | 12(1)    | 16(1)    | 1(1)     | -1(1)    | -1(1)    |
| Sr(2) | 26(1)    | 18(1)    | 39(1)    | -4(1)    | 15(1)    | -5(1)    |
| Sr(3) | 9(1)     | 11(1)    | 16(1)    | -2(1)    | 0(1)     | 0(1)     |
| B(1)  | 14(3)    | 15(3)    | 9(4)     | 0(3)     | 2(3)     | 4(3)     |
| B(2)  | 16(4)    | 17(4)    | 21(4)    | 2(3)     | 1(3)     | -2(3)    |
| B(3)  | 21(4)    | 17(4)    | 13(4)    | 3(3)     | 4(3)     | -2(3)    |
| B(4)  | 17(3)    | 5(3)     | 15(4)    | 5(3)     | 0(3)     | 2(2)     |
| B(5)  | 11(3)    | 15(3)    | 13(4)    | 4(3)     | 3(3)     | -7(3)    |
| B(6)  | 7(3)     | 13(3)    | 11(4)    | 1(3)     | 1(3)     | 1(2)     |
| B(7)  | 14(3)    | 15(4)    | 19(4)    | 3(3)     | 3(3)     | 9(3)     |
| B(8)  | 17(3)    | 7(3)     | 21(4)    | 2(3)     | 4(3)     | -5(3)    |
| B(9)  | 17(3)    | 16(4)    | 15(4)    | -4(3)    | 1(3)     | 1(3)     |
| B(10) | 20(4)    | 15(4)    | 18(4)    | -4(3)    | 0(3)     | -6(3)    |
| B(11) | 15(3)    | 6(3)     | 11(4)    | 0(3)     | 0(3)     | 2(3)     |
| B(12) | 10(3)    | 12(3)    | 15(4)    | 1(3)     | -3(3)    | -1(3)    |
| B(13) | 7(3)     | 15(3)    | 16(4)    | 1(3)     | -2(3)    | 2(3)     |
| B(14) | 10(3)    | 9(3)     | 19(4)    | 1(3)     | 2(3)     | 1(2)     |
| O(1)  | 19(2)    | 16(2)    | 15(2)    | -3(2)    | 4(2)     | -1(2)    |
| O(2)  | 16(2)    | 21(2)    | 12(2)    | -2(2)    | 5(2)     | -4(2)    |
| O(3)  | 20(2)    | 17(2)    | 12(2)    | -4(2)    | 2(2)     | -4(2)    |
| O(4)  | 22(2)    | 20(2)    | 14(2)    | 1(2)     | -2(2)    | -7(2)    |
| O(5)  | 12(2)    | 15(2)    | 15(2)    | 4(2)     | -3(2)    | 0(2)     |
| O(6)  | 11(2)    | 9(2)     | 12(2)    | -1(2)    | 0(2)     | -2(2)    |
| O(7)  | 22(2)    | 26(2)    | 17(3)    | 0(2)     | 0(2)     | 4(2)     |
| O(8)  | 18(2)    | 13(2)    | 16(2)    | -2(2)    | 3(2)     | -3(2)    |
| O(9)  | 7(2)     | 10(2)    | 21(2)    | 0(2)     | -2(2)    | -2(2)    |
| O(10) | 11(2)    | 9(2)     | 19(2)    | -2(2)    | 1(2)     | 0(2)     |
| O(11) | 10(2)    | 7(2)     | 25(3)    | 0(2)     | 2(2)     | -2(2)    |
| O(12) | 7(2)     | 10(2)    | 20(2)    | -1(2)    | -1(2)    | 0(2)     |
| O(13) | 10(2)    | 11(2)    | 19(2)    | 4(2)     | 4(2)     | 1(2)     |
| O(14) | 18(2)    | 16(2)    | 13(2)    | 0(2)     | 0(2)     | 2(2)     |
| O(15) | 9(2)     | 10(2)    | 17(2)    | -2(2)    | 0(2)     | 2(2)     |
| O(16) | 11(2)    | 5(2)     | 25(2)    | -1(2)    | 0(2)     | 1(2)     |
| O(17) | 12(2)    | 5(2)     | 22(2)    | 0(2)     | -1(2)    | -1(2)    |
| O(18) | 8(2)     | 10(2)    | 24(3)    | -1(2)    | 0(2)     | 1(2)     |
| O(19) | 9(2)     | 10(2)    | 14(2)    | 2(2)     | 2(2)     | 0(2)     |
| O(20) | 11(2)    | 6(2)     | 18(2)    | 1(2)     | 0(2)     | 1(2)     |
| O(21) | 20(2)    | 25(2)    | 23(3)    | -7(2)    | 4(2)     | 7(2)     |
| O(22) | 16(2)    | 20(2)    | 13(2)    | -3(2)    | 0(2)     | 7(2)     |
| O(23) | 20(2)    | 19(2)    | 15(2)    | 2(2)     | 2(2)     | 7(2)     |
| O(24) | 14(2)    | 13(2)    | 19(2)    | 3(2)     | 1(2)     | 2(2)     |

**Table S3.** Bond lengths (Å) and angles (°) for Sr<sub>3</sub>B<sub>14</sub>O<sub>24</sub>.

|                       |            |                   |          |
|-----------------------|------------|-------------------|----------|
| Sr(1)-O(11)           | 2.489(4)   | B(4)-O(6)         | 1.434(8) |
| Sr(1)-O(13)#1         | 2.540(4)   | B(4)-O(9)         | 1.468(7) |
| Sr(1)-O(17)#2         | 2.565(4)   | B(4)-O(24)#6      | 1.481(8) |
| Sr(1)-O(22)#2         | 2.601(4)   | B(4)-O(13)        | 1.508(7) |
| Sr(1)-O(19)#3         | 2.651(4)   | B(5)-O(12)        | 1.350(8) |
| Sr(1)-O(12)           | 2.709(4)   | B(5)-O(13)        | 1.354(7) |
| Sr(1)-O(6)#1          | 2.780(4)   | B(5)-O(11)        | 1.398(7) |
| Sr(1)-O(19)#2         | 2.917(4)   | B(6)-O(5)         | 1.434(8) |
| Sr(1)-O(15)#4         | 2.928(4)   | B(6)-O(6)         | 1.444(7) |
| Sr(1)-O(12)#5         | 2.935(4)   | B(6)-O(10)#8      | 1.497(7) |
| Sr(2)-O(8)            | 2.362(4)   | B(6)-O(20)#12     | 1.525(7) |
| Sr(2)-O(23)#6         | 2.419(4)   | B(7)-O(5)         | 1.334(8) |
| Sr(2)-O(1)#7          | 2.535(4)   | B(7)-O(4)         | 1.377(8) |
| Sr(2)-O(2)#7          | 2.659(4)   | B(7)-O(7)         | 1.383(8) |
| Sr(2)-O(24)#6         | 2.704(4)   | B(8)-O(21)        | 1.356(8) |
| Sr(2)-O(7)            | 2.771(4)   | B(8)-O(14)        | 1.364(8) |
| Sr(2)-O(14)           | 3.074(4)   | B(8)-O(7)         | 1.367(8) |
| Sr(3)-O(18)           | 2.521(4)   | B(9)-O(21)        | 1.428(8) |
| Sr(3)-O(3)#6          | 2.526(4)   | B(9)-O(8)#8       | 1.463(8) |
| Sr(3)-O(16)#8         | 2.561(4)   | B(9)-O(2)#8       | 1.507(8) |
| Sr(3)-O(9)#6          | 2.577(4)   | B(9)-O(22)        | 1.509(8) |
| Sr(3)-O(20)#9         | 2.749(4)   | B(10)-O(22)       | 1.364(8) |
| Sr(3)-O(20)           | 2.759(4)   | B(10)-O(23)       | 1.370(8) |
| Sr(3)-O(10)#6         | 2.768(4)   | B(10)-O(24)       | 1.371(8) |
| Sr(3)-O(15)#8         | 2.855(4)   | B(11)-O(15)       | 1.441(7) |
| Sr(3)-O(10)#10        | 2.865(4)   | B(11)-O(14)       | 1.446(8) |
| Sr(3)-O(4)#6          | 2.881(4)   | B(11)-O(19)#1     | 1.491(7) |
| Sr(3)-O(6)#11         | 3.049(4)   | B(11)-O(12)#13    | 1.509(7) |
| B(1)-O(10)            | 1.357(8)   | B(12)-O(15)       | 1.422(8) |
| B(1)-O(9)             | 1.363(7)   | B(12)-O(17)       | 1.481(7) |
| B(1)-O(11)            | 1.376(8)   | B(12)-O(1)#2      | 1.488(8) |
| B(2)-O(2)             | 1.352(9)   | B(12)-O(16)       | 1.492(7) |
| B(2)-O(3)             | 1.361(8)   | B(13)-O(19)       | 1.348(7) |
| B(2)-O(1)             | 1.380(8)   | B(13)-O(17)       | 1.349(7) |
| B(3)-O(4)             | 1.445(8)   | B(13)-O(18)       | 1.396(8) |
| B(3)-O(8)             | 1.458(8)   | B(14)-O(16)       | 1.336(7) |
| B(3)-O(3)             | 1.473(8)   | B(14)-O(20)       | 1.361(7) |
| B(3)-O(23)#1          | 1.489(8)   | B(14)-O(18)       | 1.412(7) |
| O(11)-Sr(1)-O(13)#1   | 120.67(13) | O(6)-B(4)-O(9)    | 112.5(5) |
| O(11)-Sr(1)-O(17)#2   | 121.69(12) | O(6)-B(4)-O(24)#6 | 115.1(5) |
| O(13)#1-Sr(1)-O(17)#2 | 114.26(12) | O(9)-B(4)-O(24)#6 | 107.9(5) |
| O(11)-Sr(1)-O(22)#2   | 75.85(13)  | O(6)-B(4)-O(13)   | 106.8(5) |
| O(13)#1-Sr(1)-O(22)#2 | 75.10(12)  | O(9)-B(4)-O(13)   | 109.3(5) |

|                       |            |                        |            |
|-----------------------|------------|------------------------|------------|
| O(17)#2-Sr(1)-O(22)#2 | 101.81(13) | O(24)#6-B(4)-O(13)     | 104.8(5)   |
| O(11)-Sr(1)-O(19)#3   | 121.28(12) | O(12)-B(5)-O(13)       | 125.3(5)   |
| O(13)#1-Sr(1)-O(19)#3 | 69.50(12)  | O(12)-B(5)-O(11)       | 115.2(5)   |
| O(17)#2-Sr(1)-O(19)#3 | 94.33(12)  | O(13)-B(5)-O(11)       | 119.5(6)   |
| O(22)#2-Sr(1)-O(19)#3 | 144.55(12) | O(5)-B(6)-O(6)         | 116.3(5)   |
| O(11)-Sr(1)-O(12)     | 52.80(12)  | O(5)-B(6)-O(10)#8      | 108.6(5)   |
| O(13)#1-Sr(1)-O(12)   | 169.24(12) | O(6)-B(6)-O(10)#8      | 107.5(5)   |
| O(17)#2-Sr(1)-O(12)   | 69.75(12)  | O(5)-B(6)-O(20)#12     | 111.0(5)   |
| O(22)#2-Sr(1)-O(12)   | 94.42(12)  | O(6)-B(6)-O(20)#12     | 107.6(4)   |
| O(19)#3-Sr(1)-O(12)   | 120.85(12) | O(10)#8-B(6)-O(20)#12  | 105.1(4)   |
| O(11)-Sr(1)-O(6)#1    | 68.99(12)  | O(5)-B(7)-O(4)         | 123.3(6)   |
| O(13)#1-Sr(1)-O(6)#1  | 52.50(12)  | O(5)-B(7)-O(7)         | 120.4(6)   |
| O(17)#2-Sr(1)-O(6)#1  | 164.66(12) | O(4)-B(7)-O(7)         | 116.1(6)   |
| O(22)#2-Sr(1)-O(6)#1  | 68.80(12)  | O(21)-B(8)-O(14)       | 121.0(6)   |
| O(19)#3-Sr(1)-O(6)#1  | 87.84(11)  | O(21)-B(8)-O(7)        | 127.1(6)   |
| O(12)-Sr(1)-O(6)#1    | 121.78(11) | O(14)-B(8)-O(7)        | 111.9(5)   |
| O(11)-Sr(1)-O(19)#2   | 170.39(12) | O(21)-B(9)-O(8)#8      | 114.4(5)   |
| O(13)#1-Sr(1)-O(19)#2 | 66.67(11)  | O(21)-B(9)-O(2)#8      | 110.8(5)   |
| O(17)#2-Sr(1)-O(19)#2 | 49.35(11)  | O(8)#8-B(9)-O(2)#8     | 109.4(5)   |
| O(22)#2-Sr(1)-O(19)#2 | 101.55(12) | O(21)-B(9)-O(22)       | 105.8(5)   |
| O(19)#3-Sr(1)-O(19)#2 | 66.10(13)  | O(8)#8-B(9)-O(22)      | 107.3(5)   |
| O(12)-Sr(1)-O(19)#2   | 118.88(11) | O(2)#8-B(9)-O(22)      | 108.8(5)   |
| O(6)#1-Sr(1)-O(19)#2  | 119.03(11) | O(22)-B(10)-O(23)      | 121.0(6)   |
| O(11)-Sr(1)-O(15)#4   | 72.64(12)  | O(22)-B(10)-O(24)      | 125.1(6)   |
| O(13)#1-Sr(1)-O(15)#4 | 102.62(12) | O(23)-B(10)-O(24)      | 113.9(6)   |
| O(17)#2-Sr(1)-O(15)#4 | 113.49(12) | O(15)-B(11)-O(14)      | 116.6(5)   |
| O(22)#2-Sr(1)-O(15)#4 | 141.38(12) | O(15)-B(11)-O(19)#1    | 107.4(5)   |
| O(19)#3-Sr(1)-O(15)#4 | 49.83(11)  | O(14)-B(11)-O(19)#1    | 107.3(5)   |
| O(12)-Sr(1)-O(15)#4   | 83.97(11)  | O(15)-B(11)-O(12)#13   | 107.3(5)   |
| O(6)#1-Sr(1)-O(15)#4  | 79.36(11)  | O(14)-B(11)-O(12)#13   | 112.6(5)   |
| O(19)#2-Sr(1)-O(15)#4 | 112.99(11) | O(19)#1-B(11)-O(12)#13 | 104.8(5)   |
| O(11)-Sr(1)-O(12)#5   | 101.44(12) | O(15)-B(12)-O(17)      | 112.4(5)   |
| O(13)#1-Sr(1)-O(12)#5 | 118.49(11) | O(15)-B(12)-O(1)#2     | 118.0(5)   |
| O(17)#2-Sr(1)-O(12)#5 | 65.93(12)  | O(17)-B(12)-O(1)#2     | 104.2(5)   |
| O(22)#2-Sr(1)-O(12)#5 | 164.12(12) | O(15)-B(12)-O(16)      | 106.3(5)   |
| O(19)#3-Sr(1)-O(12)#5 | 50.07(11)  | O(17)-B(12)-O(16)      | 109.3(5)   |
| O(12)-Sr(1)-O(12)#5   | 72.24(12)  | O(1)#2-B(12)-O(16)     | 106.5(5)   |
| O(6)#1-Sr(1)-O(12)#5  | 125.33(11) | O(19)-B(13)-O(17)      | 117.9(6)   |
| O(19)#2-Sr(1)-O(12)#5 | 78.48(11)  | O(19)-B(13)-O(18)      | 123.1(5)   |
| O(15)#4-Sr(1)-O(12)#5 | 47.84(10)  | O(17)-B(13)-O(18)      | 119.0(5)   |
| O(8)-Sr(2)-O(23)#6    | 147.91(14) | O(16)-B(14)-O(20)      | 125.3(5)   |
| O(8)-Sr(2)-O(1)#7     | 98.92(13)  | O(16)-B(14)-O(18)      | 118.7(5)   |
| O(23)#6-Sr(2)-O(1)#7  | 113.17(13) | O(20)-B(14)-O(18)      | 116.0(5)   |
| O(8)-Sr(2)-O(2)#7     | 110.98(13) | O(20)#9-Sr(3)-O(15)#8  | 123.35(11) |

|                       |            |                        |            |
|-----------------------|------------|------------------------|------------|
| O(23)#6-Sr(2)-O(2)#7  | 89.15(14)  | O(10)#6-Sr(3)-O(15)#8  | 119.46(11) |
| O(1)#7-Sr(2)-O(2)#7   | 53.16(13)  | O(18)-Sr(3)-O(10)#10   | 114.41(12) |
| O(8)-Sr(2)-O(24)#6    | 99.07(13)  | O(3)#6-Sr(3)-O(10)#10  | 136.09(12) |
| O(23)#6-Sr(2)-O(24)#6 | 52.94(13)  | O(16)#8-Sr(3)-O(10)#10 | 66.08(12)  |
| O(1)#7-Sr(2)-O(24)#6  | 147.50(13) | O(9)#6-Sr(3)-O(10)#10  | 102.78(11) |
| O(2)#7-Sr(2)-O(24)#6  | 95.00(12)  | O(20)#9-Sr(3)-O(10)#10 | 50.54(11)  |
| O(8)-Sr(2)-O(7)       | 76.69(14)  | O(20)-Sr(3)-O(10)#10   | 115.65(11) |
| O(23)#6-Sr(2)-O(7)    | 77.36(14)  | O(10)#6-Sr(3)-O(10)#10 | 72.43(13)  |
| O(1)#7-Sr(2)-O(7)     | 144.23(13) | O(15)#8-Sr(3)-O(10)#10 | 85.30(11)  |
| O(2)#7-Sr(2)-O(7)     | 161.50(13) | O(18)-Sr(3)-O(4)#6     | 73.76(13)  |
| O(24)#6-Sr(2)-O(7)    | 66.80(12)  | O(3)#6-Sr(3)-O(4)#6    | 49.77(12)  |
| O(8)-Sr(2)-O(14)      | 91.37(12)  | O(16)#8-Sr(3)-O(4)#6   | 117.88(13) |
| O(23)#6-Sr(2)-O(14)   | 83.49(12)  | O(9)#6-Sr(3)-O(4)#6    | 65.97(12)  |
| O(1)#7-Sr(2)-O(14)    | 100.35(12) | O(20)#9-Sr(3)-O(4)#6   | 122.72(11) |
| O(2)#7-Sr(2)-O(14)    | 146.55(12) | O(20)-Sr(3)-O(4)#6     | 62.22(12)  |
| O(24)#6-Sr(2)-O(14)   | 106.05(12) | O(10)#6-Sr(3)-O(4)#6   | 98.69(12)  |
| O(7)-Sr(2)-O(14)      | 45.17(12)  | O(15)#8-Sr(3)-O(4)#6   | 105.39(11) |
| O(18)-Sr(3)-O(3)#6    | 84.37(13)  | O(10)#10-Sr(3)-O(4)#6  | 168.74(11) |
| O(18)-Sr(3)-O(16)#8   | 118.60(12) | O(18)-Sr(3)-O(6)#11    | 68.20(12)  |
| O(3)#6-Sr(3)-O(16)#8  | 70.08(13)  | O(3)#6-Sr(3)-O(6)#11   | 138.58(12) |
| O(18)-Sr(3)-O(9)#6    | 120.08(12) | O(16)#8-Sr(3)-O(6)#11  | 95.84(11)  |
| O(3)#6-Sr(3)-O(9)#6   | 100.13(13) | O(9)#6-Sr(3)-O(6)#11   | 120.20(12) |
| O(16)#8-Sr(3)-O(9)#6  | 118.89(12) | O(20)#9-Sr(3)-O(6)#11  | 48.46(10)  |
| O(18)-Sr(3)-O(20)#9   | 96.85(12)  | O(20)-Sr(3)-O(6)#11    | 80.65(10)  |
| O(3)#6-Sr(3)-O(20)#9  | 171.76(12) | O(10)#6-Sr(3)-O(6)#11  | 117.25(11) |
| O(16)#8-Sr(3)-O(20)#9 | 115.91(12) | O(15)#8-Sr(3)-O(6)#11  | 76.21(11)  |
| O(9)#6-Sr(3)-O(20)#9  | 72.18(12)  | O(10)#10-Sr(3)-O(6)#11 | 47.16(10)  |
| O(18)-Sr(3)-O(20)     | 52.67(11)  | O(4)#6-Sr(3)-O(6)#11   | 138.08(11) |
| O(3)#6-Sr(3)-O(20)    | 107.30(12) | O(20)-Sr(3)-O(15)#8    | 120.62(11) |
| O(16)#8-Sr(3)-O(20)   | 171.26(12) | O(10)-B(1)-O(9)        | 117.3(6)   |
| O(9)#6-Sr(3)-O(20)    | 69.57(11)  | O(10)-B(1)-O(11)       | 123.9(5)   |
| O(20)#9-Sr(3)-O(20)   | 67.64(13)  | O(9)-B(1)-O(11)        | 118.7(6)   |
| O(18)-Sr(3)-O(10)#6   | 171.08(12) | O(2)-B(2)-O(3)         | 124.1(6)   |
| O(3)#6-Sr(3)-O(10)#6  | 94.41(13)  | O(2)-B(2)-O(1)         | 116.8(6)   |
| O(16)#8-Sr(3)-O(10)#6 | 68.92(11)  | O(3)-B(2)-O(1)         | 119.1(6)   |
| O(9)#6-Sr(3)-O(10)#6  | 51.37(11)  | O(4)-B(3)-O(8)         | 116.7(5)   |
| O(20)#9-Sr(3)-O(10)#6 | 83.12(12)  | O(4)-B(3)-O(3)         | 103.9(5)   |
| O(20)-Sr(3)-O(10)#6   | 119.81(11) | O(8)-B(3)-O(3)         | 108.1(5)   |
| O(18)-Sr(3)-O(15)#8   | 67.97(11)  | O(4)-B(3)-O(23)#1      | 110.3(5)   |
| O(3)#6-Sr(3)-O(15)#8  | 64.67(12)  | O(8)-B(3)-O(23)#1      | 108.7(5)   |
| O(16)#8-Sr(3)-O(15)#8 | 50.64(11)  | O(3)-B(3)-O(23)#1      | 108.8(5)   |
| O(9)#6-Sr(3)-O(15)#8  | 163.06(12) |                        |            |

Symmetry transformations used to generate equivalent atoms:

|                                 |                                 |
|---------------------------------|---------------------------------|
| #1 $x + 1, y, z$                | #2 $-x + 2, y - 1/2, -z + 3/2$  |
| #3 $x + 2, -y + 1/2, z + 1/2$   | #4 $x + 1, -y + 1/2, z + 1/2$   |
| #5 $-x + 3, -y, -z + 2$         | #6 $-x + 1, y - 1/2, -z + 3/2$  |
| #7 $-x + 3, y - 1/2, -z + 3/2$  | #8 $x - 1, y, z$                |
| #9 $-x, -y, -z + 1$             | #10 $x - 2, -y + 1/2, z - 1/2$  |
| #11 $x - 1, -y + 1/2, z - 1/2$  | #12 $-x + 1, y + 1/2, -z + 3/2$ |
| #13 $-x + 2, y + 1/2, -z + 3/2$ | #14 $-x + 3, y + 1/2, -z + 3/2$ |



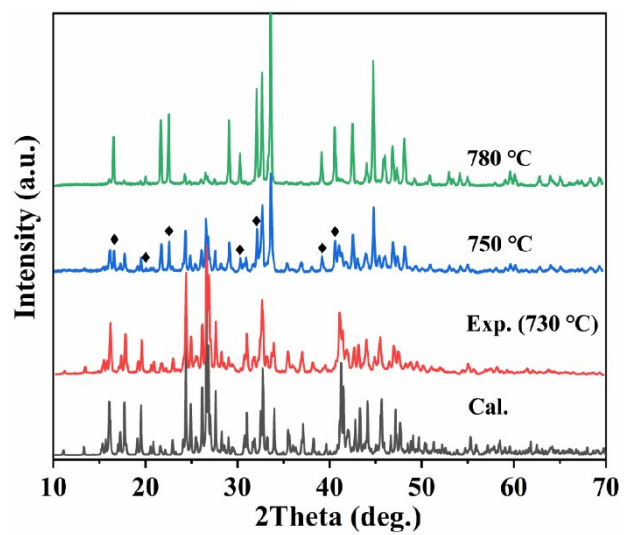

**Fig. S1** Powder XRD patterns of  $\text{Sr}_3\text{B}_{14}\text{O}_{24}$  after heating at different temperatures.

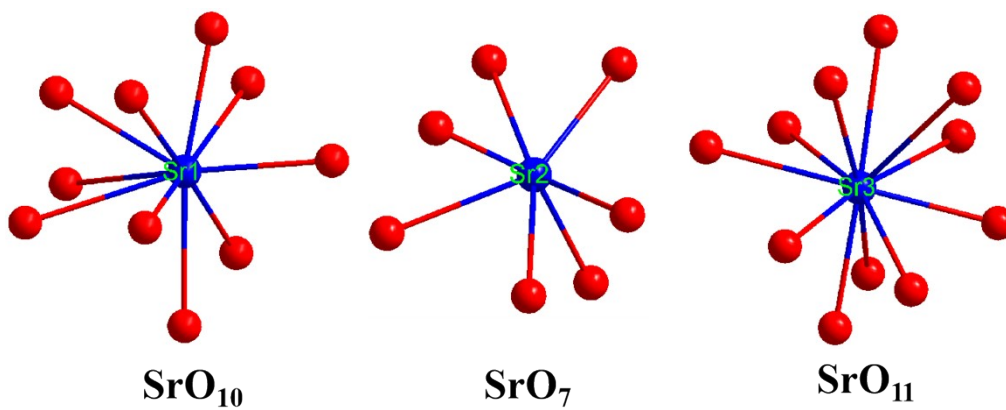

**Fig. S2** Coordination environments of the cations in Sr<sub>3</sub>B<sub>14</sub>O<sub>24</sub>.

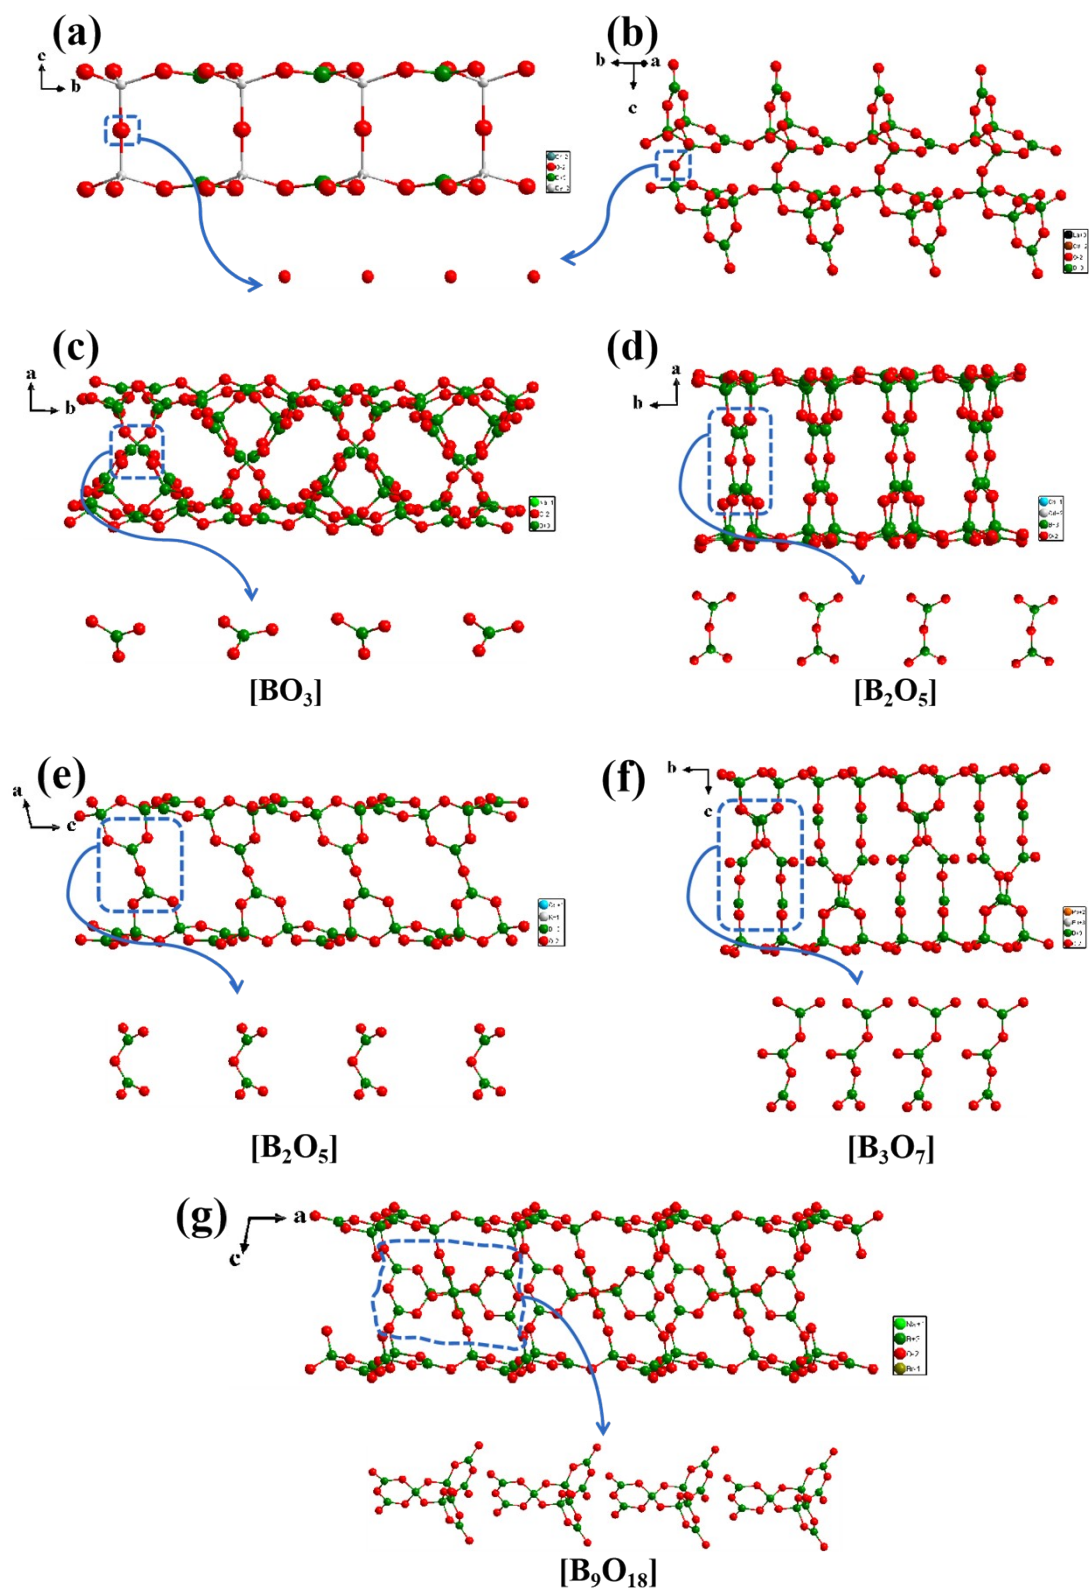

**Fig. S3** Different connection motifs between sub layers in layered structures  $\text{Sr}_2\text{Be}_2\text{B}_2\text{O}_7$  (a),  $\text{La}_2\text{CaB}_{10}\text{O}_{19}$  (b),  $\text{Na}_2\text{B}_6\text{O}_{10}$  (c),  $\text{Cd}_3\text{Cs}_2\text{B}_{16}\text{O}_{28}$  (d),  $\text{Cs}_2\text{K}_2\text{B}_{10}\text{O}_{17}$  (e),  $\text{PbEuB}_7\text{O}_{13}$  (f) and  $\text{Na}_{11}\text{B}_{21}\text{O}_{36}\text{Br}_2$  (g).

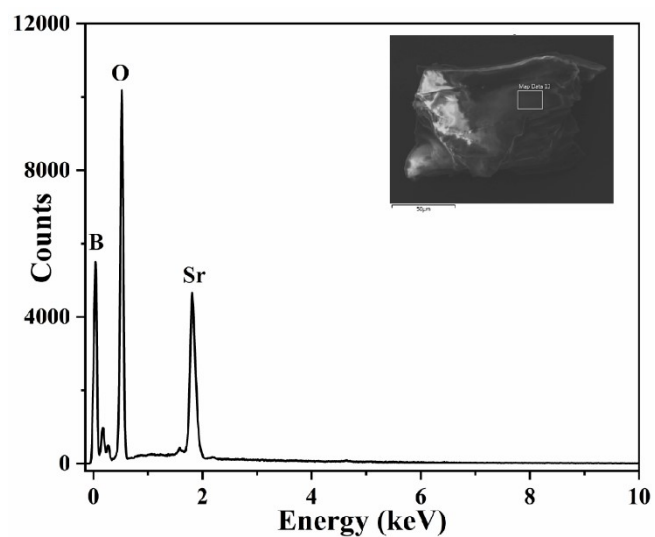

**Fig. S4** Energy dispersive X-ray spectroscopy (EDS).

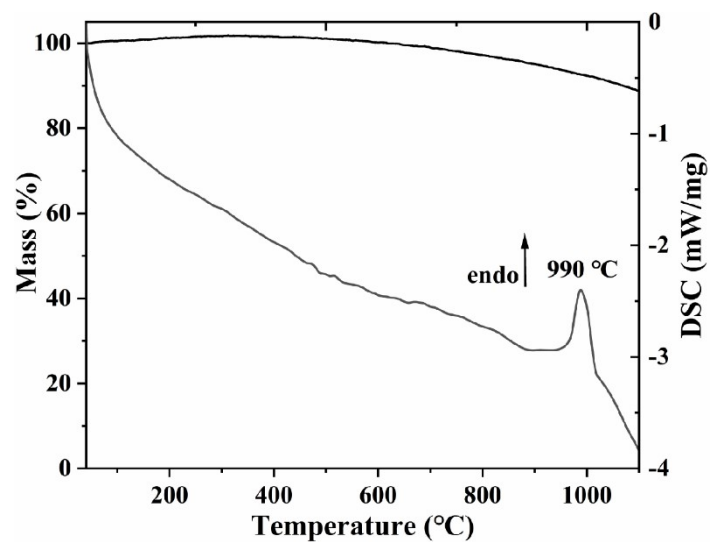

Fig. S5 TG-DSC curves.

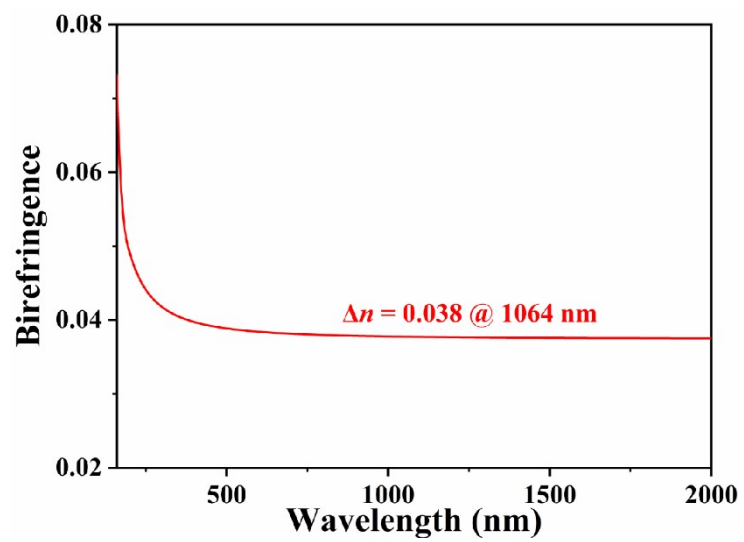

**Fig. S6** The calculated birefringence of  $\text{Sr}_3\text{B}_{14}\text{O}_{24}$ .
